# Supplementary material
Source: Research Square preprint supplement (doi:10.21203/rs.3.rs-9045852/v1)
Supplement: Supplementary file 1 [file 3b28dac5c73986a932804d74.docx]

**Table 1**

**Cryo-EM data collection, refinement and validation statistics**

|  | ERp44-ERAP1  Mode I State 1  (EMDB- 69135)  (PDB:23OW) | ERp44ERAP1  Mode I state 2  (EMDB-69136)  (PDB:23OY) | ERp44-ERAP1  Mode II  (EMDB-69141)  (PDB: 23PE) | ERp44-ERAP1  High resolution  (EMDB-69133)  (PDB:23OU) |
| --- | --- | --- | --- | --- |
| **Data collection and processing** |  |  |  |  |
| Magnification | 60,000 | | | 60,000 |
| Voltage (kV) | 300 | | | 300 |
| Electron microscope | CRYO ARM 300II | | | CRYO ARM 300II |
| Electron exposure (e–/Å2) | 50 | | | 50 |
| Defocus range (μm) | -0.8~ -1.6 | | | -0.8 - -1.6 |
| Pixel size (Å) | 0.788 | | | 0.788 |
| Symmetry imposed | C1 | C1 | C1 | C1 |
| Initial particle images (no.) | 2,928,119 |  |  | 3,063,685 |
| Final particle images (no.) | 35,751 | 38,880 | 46949 | 54,849 |
| Map resolution (Å)  FSC threshold (0.143) | 3.75 | 3.87 | 4.37 | 3.05 |
| Map resolution range (Å) | 3.1~8.0 | 3.3~8.2 | 3.6~8.5 | 2.6~6.7 |
|  |  |  |  |  |
| **Refinement** |  |  |  |  |
| Initial model used (PDB code) | 5GU6, 5XWM  3QNF |  |  |  |
| Model resolution (Å)  FSC threshold (0.5) | 4.5 | 4.5 | 8.7 | 3.3 |
| Map sharpening *B* factor (Å2) | 0 | 0 | -60 | -101.5 |
| Model composition  Non-hydrogen atoms  Protein residues  Ligands | 9590 1199 4 | 9482  1190  4 | 9212  1166  3 | 7796  981  4 |
| *B* factors (Å2)  Protein  Ligand | 178.1 152.7 | 181.7  151.3 | 255.7 296.3 | 92.76  104.52 |
| R.m.s. deviations  Bond lengths (Å)  Bond angles (°) | 0.005  1.002 | 0.003  0.863 | 0.003  0.641 | 0.003 0.679 |
| Validation  MolProbity score  Clashscore  Poor rotamers (%) | 2.13  9.9  2.85 | 1.96 9.62  2.28 | 2.24  10.13  4.49 | 2.01  7.59  2.79 |
| Ramachandran plot  Favored (%)  Allowed (%)  Disallowed (%) | 96.1  3.9  0.0 | 97.0 3.0 0.0 | 96.6  3.4  0.0 | 96.2  3.8  0.0 |
|  |  |  |  |  |

|  | ERp44-Ero1α  Mode I  (EMDB-69146)  (PDB:23PL) | ERp44-Ero1α  Mode I (high resolution)  (EMDB-69147)  (PDB: 23PM) | ERp44-Ero1α  Mode II mono  (EMDB-69149)  (PDB: 23PO) | ERp44-Ero1α  Mode II Dimer  (EMDB-69153)  (PDB: 23PR) |
| --- | --- | --- | --- | --- |
| **Data collection and processing** |  |  |  |  |
| Magnification | 60,000 | 60,000 | 165,000 | |
| Voltage (kV) | 200 | 200 | 300 | |
| Electron microscope | CRYO-ARM200 | CRYO-ARM200 | Krios G4 | |
| Electron exposure (e–/Å2) | 50 | 50 | 50 | |
| Defocus range (μm) | -0.8 - -1.6 | -0.8 - -1.6 | -0.8 - -1.6 | |
| Pixel size (Å) | 0.828 | 0.828 | 0.727 | |
| Symmetry imposed | C1 | C1 | C1 | C1 |
| Initial particle images (no.) | 4,337,257 | 11,420,436 | 5,115,120 |  |
| Final particle images (no.) | 153,272 | 70,684 | 36315 | 62,985 |
| Map resolution (Å)  FSC threshold (0.143) | 3.65 | 3.55 | 3.90 | 4.13 |
| Map resolution range (Å) | 3.42-5.64 | 3.39-4.41 | 3.2-8.1 | 3.3-10.3 |
|  |  |  |  |  |
| **Refinement** |  |  |  |  |
| Initial model used (PDB code) | 5GU6,5XWM 3AHQ |  |  |  |
| Model resolution (Å)  FSC threshold (0.5) | 7.3 | 6.9 | 8.0 | 8.5 |
| Model resolution range (Å) |  |  |  |  |
| Map sharpening *B* factor (Å2) | 0 | 0 | 0 | 0 |
| Model composition  Non-hydrogen atoms  Protein residues  Ligands | 5727  692  2 | 3972  475  2 | 5749  697  2 | 11498  1394  4 |
| *B* factors (Å2)  Protein  Ligand | 219.7  160.09 | 168.9 134.5 | 217.1  189.2 | 282.5  249.9 |
| R.m.s. deviations  Bond lengths (Å)  Bond angles (°) | 0.005  0.85 | 0.03 1.022 | 0.004  0.999 | 0.003  0.701 |
| Validation  MolProbity score  Clashscore  Poor rotamers (%) | 2.81  13.9  11.89 | 2.25 12.44  2.82 | 2.42  13.7  3.25 | 2.37  9.08  5.19 |
| Ramachandran plot  Favored (%)  Allowed (%)  Disallowed (%) | 95.0  5  0.0 | 95.7  4.3  0.0 | 94.3  5.7  0.0 | 95.1  4.9  0.0 |
